# Supplementary material for: Greater Consumption of Total and Individual Lignans and Dietary Fibers Were Significantly Associated with Lowered Risk of Hip Fracture—A 1:1 Matched Case–Control Study among Chinese Elderly Men and Women
Source: MDPI journal article supplement (doi:10.3390/nu14051100), 2022-03-05
Supplement: s1 [file s1]

**Table S1:** The main food sources of dietary intake of lignans and its four subclasses in Chinese elderly men and women, Guangzhou, China

|                          | Mean±SD     | Median(quartile range) | Main food sources (%)                                                                                         |
|--------------------------|-------------|------------------------|---------------------------------------------------------------------------------------------------------------|
| Total lignans (µg/d)     | 469.8±898.5 | 375.8 (255.3, 532.8)   | Vegetables (56.7%), nuts (22.8%), cereals (9.6%), legumes (4.4%), fruits (3.6%), tea (2.3%) and milk (0.5%).  |
| Individual lignans(µg/d) |             |                        |                                                                                                               |
| MAT(µg/d)                | 4.6±12.7    | 3.3 (2.0, 5.3)         | Nuts (37.5%), vegetables (20.8%), fruits (15.6%), cereals (12.2%), legumes (6.4%), milk (5.2%) and tea (2.2%) |
| LARI(µg/d)               | 183.5±164.6 | 160.0 (117.2, 216.1)   | Vegetables (73.8%), cereals (11.8%), nuts (8.2%), legumes (3.6%), fruits (2.1%), milk (0.3%) and tea (0%)     |
| PINO(µg/d)               | 226.7±682.4 | 152.6 (90.8, 264.0)    | Vegetables (49.1%), nuts (40.4%), fruits (4.1%), legumes (2.1%), cereals (3.5%), tea (0.6%) and milk (0.2%)   |
| SECO(µg/d)               | 55.8±88.1   | 43.8(29.2, 61.8)       | Vegetables (30.5%), cereals (23.0%), tea (14.9%), legumes (14.0%), nuts (9.3%), fruits (6.1%) and milk (1.4%) |

Dietary total and individual lignans were presented as both mean±standard deviation and median (quartile range). The percentages of food sources for total and individual lignans were calculated as the amount (µg/d) of lignans intake from individual food sources divided by lignans amounts from all food sources, and then multiply 100. MAT: matairesinol; SECO: secoisolariciresinol; PINO: pinoresinol; LARI: lariciresinol.
